# Supplementary material for: Vapor-fed electrolysis of water using earth-abundant catalysts in Nafion or in bipolar Nafion/poly(benzimidazolium) membranes
Source: Royal Society of Chemistry journal article supplement (doi:10.1039/c9se00672a), 2019-01-01
Supplement: c9se00672a1.pdf [file c9se00672a1.pdf]

## Vapor-Fed Electrolysis of Water Using Earth-Abundant Catalysts in Nafion or in Bipolar Nafion/ Poly(benzimidazolium) Membranes: Supporting Information

*Authors:* Patrick K. Giesbrecht;<sup>1,2</sup> Astrid M. Müller;<sup>3,4</sup> Carlos G. Read;<sup>5</sup> Steven Holdcroft;<sup>6</sup> Nathan S. Lewis;<sup>5</sup> Michael S. Freund<sup>1,2</sup>

*Affiliations:* <sup>1</sup>Department of Chemistry, Florida Institute of Technology, Melbourne, Florida 32901, United States; <sup>2</sup>Department of Chemistry, Dalhousie University, 6274 Coburg Road, Halifax, NS B3H 4R2, Canada; <sup>3</sup>Beckman Institute, California Institute of Technology, 1200 E. California Boulevard, Mail Code 139-74, Pasadena, California 91125, United States; <sup>4</sup>Department of Chemical Engineering, University of Rochester, Rochester, New York 14627, United States; <sup>5</sup>Division of Chemistry and Chemical Engineering, California Institute of Technology, Pasadena, California 91125, United States; <sup>6</sup>Department of Chemistry, Simon Fraser University, Burnaby, BC V5A 1S6, Canada

### Table of Contents

#### 1. Catalyst Films and Solution-Phase HER/OER ..... S3

**Figure S1.** Tafel plots of a) HER catalyst films in 0.50 M H<sub>2</sub>SO<sub>4</sub>(aq); and b) OER catalyst films in 1.0 M KOH(aq). Dashed lines represent predicted Tafel slopes for an HER/OER electrocatalyst under operation with  $n\alpha=0.5$ , 1, 2 (120, 59 and 30 mV dec<sup>-1</sup>).<sup>1,2</sup> ..... S3

**Figure S2.** Scanning-electron micrographs of a) Pt/C and b) IrO<sub>x</sub> Nafion-based films on C-paper prior to MEA incorporation. Catalyst loadings of 3 mg cm<sup>-2</sup>. ..... S3

**Table S1.** Overpotentials for the Cathode and Anode Catalysts Determined in this Work. .... S4

#### 2. TP-WS Capabilities of MEAs in this work. .... S4

**Figure S3.** Comparison of the TP-WS performance in a two-electrode configuration under humid-N<sub>2</sub>(g) flow at room temperature of a commercially available Pt/IrRuO<sub>x</sub> sample (black trace) with that of an in-house Pt/IrO<sub>x</sub> MEA used in this work (red trace). a) Steady-state polarization data and b) constant-current electrolysis at 10 mA cm<sup>-2</sup>. Catalyst loadings were 3 mg cm<sup>-2</sup>. .... S4

**Figure S4.** a) Constant-current electrolysis (10 mA cm<sup>-2</sup>) data for CoP-Ti/IrO<sub>x</sub> MEAs performing TP-WS under humid-N<sub>2</sub>(g) flow at room temperature in the absence (blue trace) and presence (grey trace) of a Nafion overcoat. b) Steady-state polarization and c) constant-current electrolysis (10 mA cm<sup>-2</sup>) data for CoP-C/IrO<sub>x</sub> MEAs performing TP-WS under humid-N<sub>2</sub>(g) flow at room temperature with and without C black (cb) incorporated into the CoP side or a Nafion overcoat. Nafion-based Pt/C/IrO<sub>x</sub> MEA (red squares) shown for comparison. CoP loading of 2 mg cm<sup>-2</sup> for C-paper-based cathodes. IrO<sub>x</sub> loading of 3 mg cm<sup>-2</sup> on C-paper for the anode. .... S5

**Figure S5.** a) Steady-state polarization and b) constant-current electrolysis (10 mA cm<sup>-2</sup>) data for [NiFe]-LDH samples performing TP-WS under humid-N<sub>2</sub>(g) flow at room temperature with a HMT-PMBI overlayer (light blue, brown traces) and a HMT-PMBI backlayer (dark blue trace). A Nafion-based Pt/C/IrO<sub>x</sub> MEA (red) is shown for comparison. [NiFe]-LDH loading of 0.6 mg cm<sup>-2</sup> on the anode; Pt/C loading of 3 mg cm<sup>-2</sup> on C-paper for the cathode. .... S5

**Figure S6.** a) Steady-state polarization and b) constant-current electrolysis (10 mA cm<sup>-2</sup>) data for [NiFe]-LDH samples performing TP-WS under humid-N<sub>2</sub>(g) flow at room temperature with HMT-PMBI-Br (gold) or HMT-PMBI-OH (brown) as the ionomer binder. Nafion-based Pt/C/IrO<sub>x</sub> MEA (red) shown for comparison. [NiFe]-LDH loading of 0.6 mg cm<sup>-2</sup> on the anode; Pt/C loading of 3 mg cm<sup>-2</sup> on C-paper for the cathode. .... S6

|                                                                                                                                                                                                                                                                                                                                                                                                                                                                                                                                                                                                                                                                                       |     |
|---------------------------------------------------------------------------------------------------------------------------------------------------------------------------------------------------------------------------------------------------------------------------------------------------------------------------------------------------------------------------------------------------------------------------------------------------------------------------------------------------------------------------------------------------------------------------------------------------------------------------------------------------------------------------------------|-----|
| <b>Figure S7.</b> a-c) Steady-state polarization and d-e) constant-current electrolysis ( $10 \text{ mA cm}^{-2}$ ) data for multiple samples of a,d) Nafion-based Pt/IrO <sub>x</sub> and CoP-Ti/IrO <sub>x</sub> MEAs, b) Pt/IrO <sub>x</sub> BPM-based MEAs, c,e) Pt/[NiFe] BPM-based MEAs performing TP-WS under humid-N <sub>2</sub> (g) flow at room temperature. CoP loading of $2.5 \text{ mg cm}^{-2}$ on Ti-paper or C-paper for the cathode; IrO <sub>x</sub> loading of $3 \text{ mg cm}^{-2}$ on C-paper for the anode; [NiFe]-LDH loading of $0.6 \text{ mg cm}^{-2}$ on C-paper for the anode; Pt/C loading of $3 \text{ mg cm}^{-2}$ on C-paper for the cathode. .... | S6  |
| <b>Figure S8.</b> Constant-current electrolysis ( $10 \text{ mA cm}^{-2}$ ) data for a) Nafion-based (red) and BPM-based (blue) Pt/IrO <sub>x</sub> MEAs; b) Pt/[NiFe] BPM-based MEA; c) CoP-C/IrO <sub>x</sub> Nafion-based MEA; and d) CoP-Ti/IrO <sub>x</sub> Nafion-based MEA before and after rehydration of the MEA under open-circuit voltage conditions. CoP loading of $2.5 \text{ mg cm}^{-2}$ on Ti-paper or C-paper for the cathode; IrO <sub>x</sub> loading of $3 \text{ mg cm}^{-2}$ on C-paper for the anode; [NiFe]-LDH loading of $0.6 \text{ mg cm}^{-2}$ on C-paper for the anode; Pt/C loading of $3 \text{ mg cm}^{-2}$ on C-paper for the cathode. S7          | S7  |
| <b>Figure S9.</b> Bode Plots for representative MEAs at the operating voltage $V_{10 \text{ mA cm}^{-2}}$ for TP-WS in this work: a) Pt/IrO <sub>x</sub> Nafion-based MEA; b) Pt/IrO <sub>x</sub> BPM-based MEAs (Pt/IrO <sub>x</sub> -10 light blue; Pt/IrO <sub>x</sub> -30 dark blue); c) CoP-Ti/IrO <sub>x</sub> MEA; d) Pt/[NiFe]-30 (gold) and Pt/[NiFe]-100 (brown) BPM-based MEAs; e) CoP-C/IrO <sub>x</sub> MEA before (purple) and after (blue) constant-current electrolysis at $10 \text{ mA cm}^{-2}$ . ....                                                                                                                                                             | S8  |
| <b>Figure S10.</b> Equivalent circuit model fits to EIS spectra at the operating voltage $V_{10 \text{ mA cm}^{-2}}$ for representative MEAs in this work. ....                                                                                                                                                                                                                                                                                                                                                                                                                                                                                                                       | S9  |
| <b>Table S2.</b> Series, polarization, mass-transport and activation overvoltages determined from EIS data at $V_{10 \text{ mA cm}^{-2}}$ for representative MEAs studied in this work. ....                                                                                                                                                                                                                                                                                                                                                                                                                                                                                          | S9  |
| <b>Table S3.</b> Values of the operating voltage $V_{10 \text{ mA cm}^{-2}}$ and the drift in the operating voltage during constant-current electrolysis at $10 \text{ mA cm}^{-2}$ for individual MEAs studied in this work. ....                                                                                                                                                                                                                                                                                                                                                                                                                                                    | S10 |
| <b>Table S4.</b> EIS equivalent circuit model values for representative MEAs in this work. Uncorrected for surface area of MEA. ....                                                                                                                                                                                                                                                                                                                                                                                                                                                                                                                                                  | S10 |
| <b>Determination of the mass-transport overvoltage at <math>10 \text{ mA cm}^{-2}</math>.</b> ....                                                                                                                                                                                                                                                                                                                                                                                                                                                                                                                                                                                    | S11 |
| <b>Determination of the longevity of co-ion current at <math>10 \text{ mA cm}^{-2}</math> in BPM-based MEAs.</b> ....                                                                                                                                                                                                                                                                                                                                                                                                                                                                                                                                                                 | S11 |
| <b>Calculation of current contribution through carbonate removal.</b> ....                                                                                                                                                                                                                                                                                                                                                                                                                                                                                                                                                                                                            | S11 |
| <b>References</b> .....                                                                                                                                                                                                                                                                                                                                                                                                                                                                                                                                                                                                                                                               | S11 |

1. Catalyst Films and Solution-Phase HER/OER.

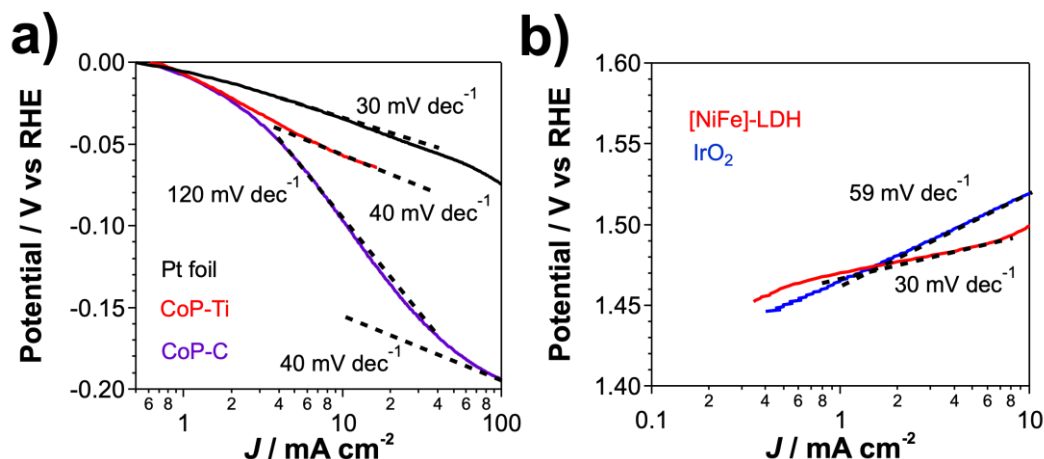

**Figure S1.** Tafel plots of a) HER catalyst films in 0.50 M  $\text{H}_2\text{SO}_4(\text{aq})$ ; and b) OER catalyst films in 1.0 M  $\text{KOH}(\text{aq})$ . Dashed lines in a) represent predicted Tafel slopes for an HER electrocatalyst under operation (120, 40 and 30  $\text{mV dec}^{-1}$ ). Dashed lines in b) represent predicted Tafel slopes for an OER electrocatalyst under operation with  $n(1-\alpha) = 1, 2$  (Tafel slopes of 59 and 30  $\text{mV dec}^{-1}$ ).<sup>1,2</sup>

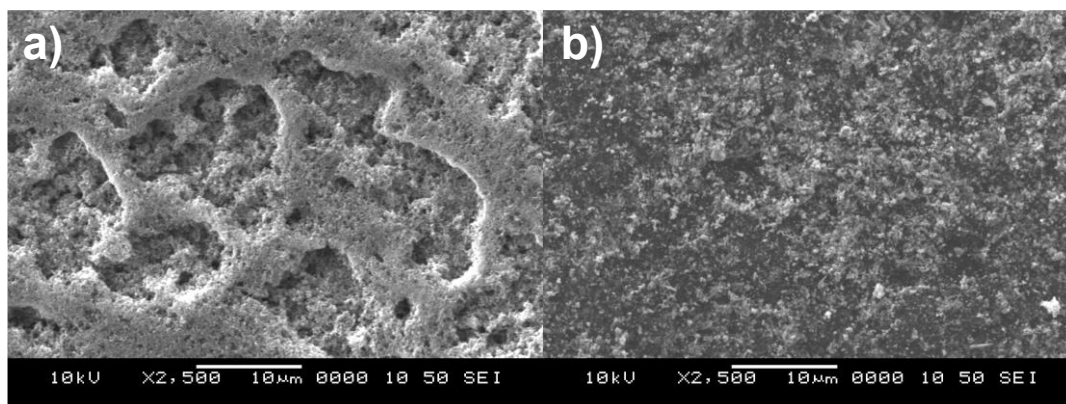

**Figure S2.** Scanning-electron micrographs of a) Pt/C and b)  $\text{IrO}_x$  Nafion-based films on C-paper prior to MEA incorporation. Catalyst loadings of 3  $\text{mg cm}^{-2}$ .

**Table S1.** Overpotentials, Tafel slope, and exchange current densities for the cathode and anode catalysts determined in this work.

| Catalyst                      | Loading (mg cm <sup>-2</sup> ) | $\eta_{-10 \text{ mA cm}^{-2}}$<br>(HER, V) <sup>a</sup> | $\eta_{10 \text{ mA cm}^{-2}}$<br>(OER, V) <sup>b</sup> | Tafel Slope<br>(mV dec <sup>-1</sup> ) <sup>c</sup> | $J_0$ (mA cm <sup>-2</sup> ) |
|-------------------------------|--------------------------------|----------------------------------------------------------|---------------------------------------------------------|-----------------------------------------------------|------------------------------|
| Pt foil                       | -                              | -0.045                                                   | -                                                       | 29                                                  | 0.9                          |
| CoP-Ti <sup>d</sup>           | 2.5                            | -0.062                                                   | -                                                       | 49                                                  | 0.1                          |
| CoP-C <sup>e</sup>            | 2                              | -0.068                                                   | -                                                       | 132; 44                                             | - <sup>g</sup>               |
| IrO <sub>x</sub> <sup>f</sup> | 2                              | -                                                        | 0.300                                                   | 55                                                  | 5x10 <sup>-5</sup>           |
| [NiFe]-LDH <sup>f</sup>       | 0.4                            | -                                                        | 0.286                                                   | 25; 63                                              | 2x10 <sup>-11</sup>          |

<sup>a</sup>HER in 0.50 M H<sub>2</sub>SO<sub>4</sub>(aq). <sup>b</sup>OER in 1.0 M KOH(aq). <sup>c</sup>Tafel slope reported at low and high overpotentials if potential-dependent. <sup>d</sup>CoP deposited on Ti paper. <sup>e</sup>CoP deposited on C-paper. <sup>f</sup>Dropcast film on glassy-carbon-disk electrode. <sup>g</sup>Potential-dependent Tafel slope prevented accurate determination of the exchange current density.

## 2. TP-WS Capabilities of MEAs in this work.

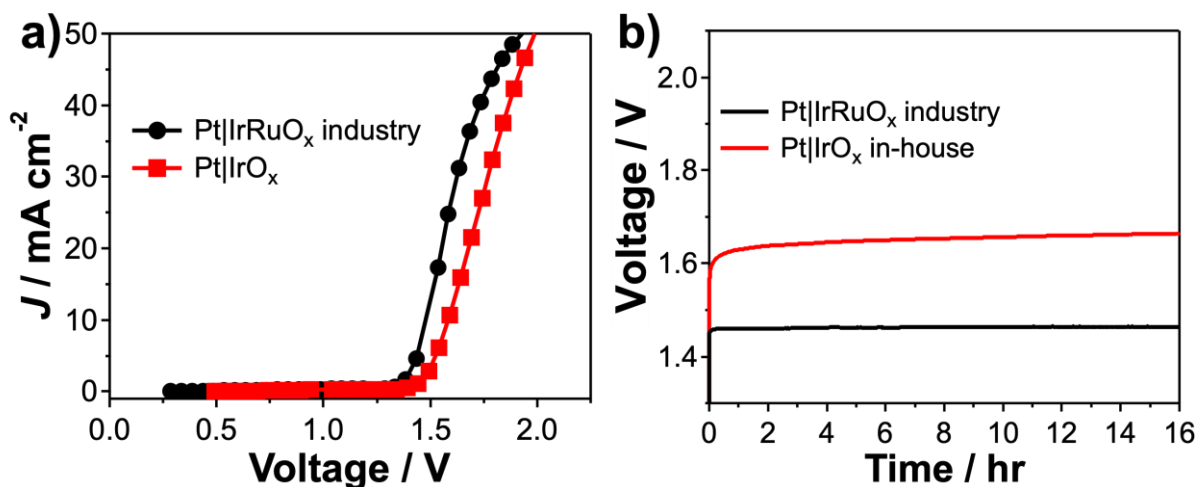

**Figure S3.** Comparison of the TP-WS performance in a two-electrode configuration under humid-N<sub>2</sub>(g) flow at room temperature of a commercially available Pt|IrRuO<sub>x</sub> sample (black trace) with that of an in-house Pt|IrO<sub>x</sub> MEA used in this work (red trace). a) Steady-state polarization data and b) constant-current electrolysis at 10 mA cm<sup>-2</sup>. Catalyst loadings were 3 mg cm<sup>-2</sup>.

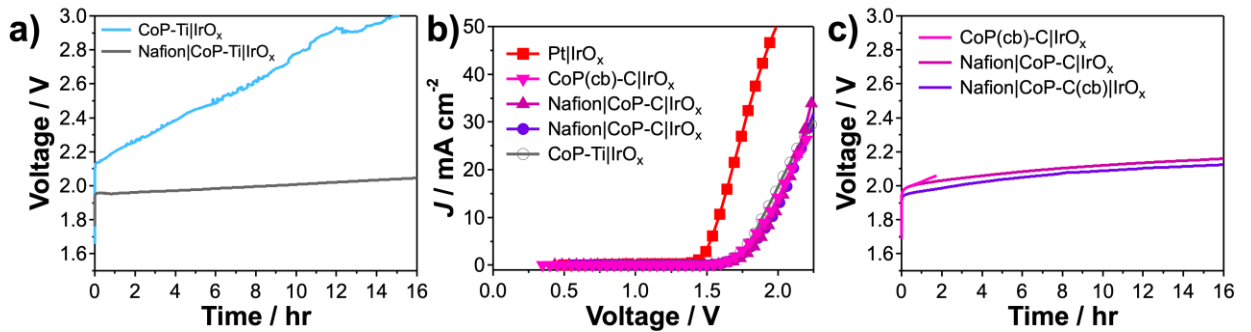

**Figure S4.** a) Constant-current electrolysis ( $10 \text{ mA cm}^{-2}$ ) data for CoP-Ti|IrO<sub>x</sub> MEAs performing TP-WS under humid-N<sub>2</sub>(g) flow at room temperature in the absence (blue trace) and presence (grey trace) of a Nafion overcoat. b) Steady-state polarization and c) constant-current electrolysis ( $10 \text{ mA cm}^{-2}$ ) data for CoP-C|IrO<sub>x</sub> MEAs performing TP-WS under humid-N<sub>2</sub>(g) flow at room temperature with and without C black (cb) incorporated into the CoP side or a Nafion overcoat. Nafion-based Pt/C|IrO<sub>x</sub> MEA (red squares) shown for comparison. CoP loading of  $2 \text{ mg cm}^{-2}$  for C-paper-based cathodes. IrO<sub>x</sub> loading of  $3 \text{ mg cm}^{-2}$  on C-paper for the anode.

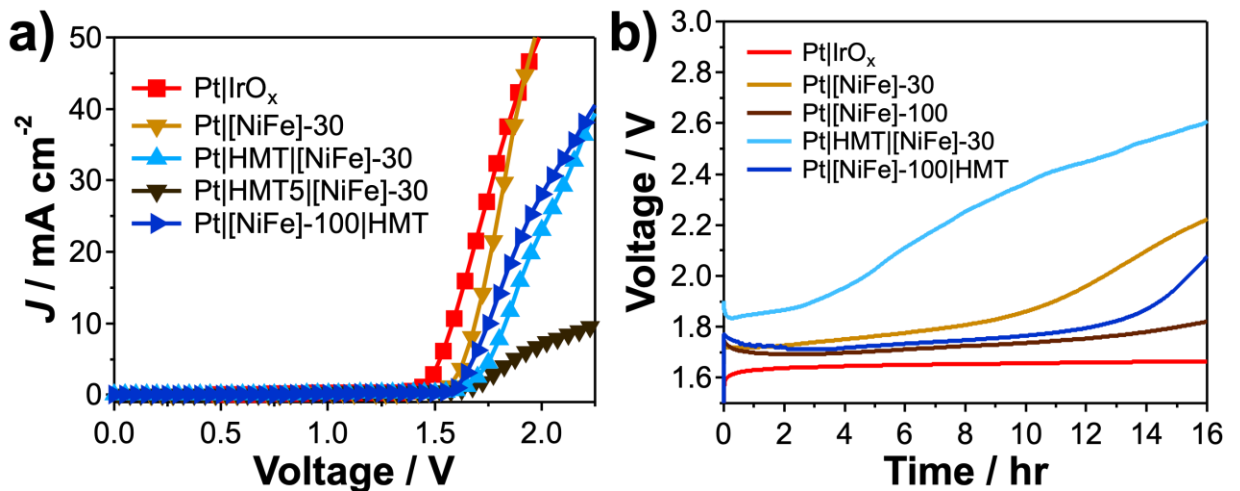

**Figure S5.** a) Steady-state polarization and b) constant-current electrolysis ( $10 \text{ mA cm}^{-2}$ ) data for [NiFe]-LDH samples performing TP-WS under humid-N<sub>2</sub>(g) flow at room temperature with a HMT-PMBI overlayer (light blue, brown traces) and a HMT-PMBI backlayer (dark blue trace). A Nafion-based Pt/C|IrO<sub>x</sub> MEA (red) is shown for comparison. [NiFe]-LDH loading of  $0.6 \text{ mg cm}^{-2}$  on the anode; Pt/C loading of  $3 \text{ mg cm}^{-2}$  on C-paper for the cathode.

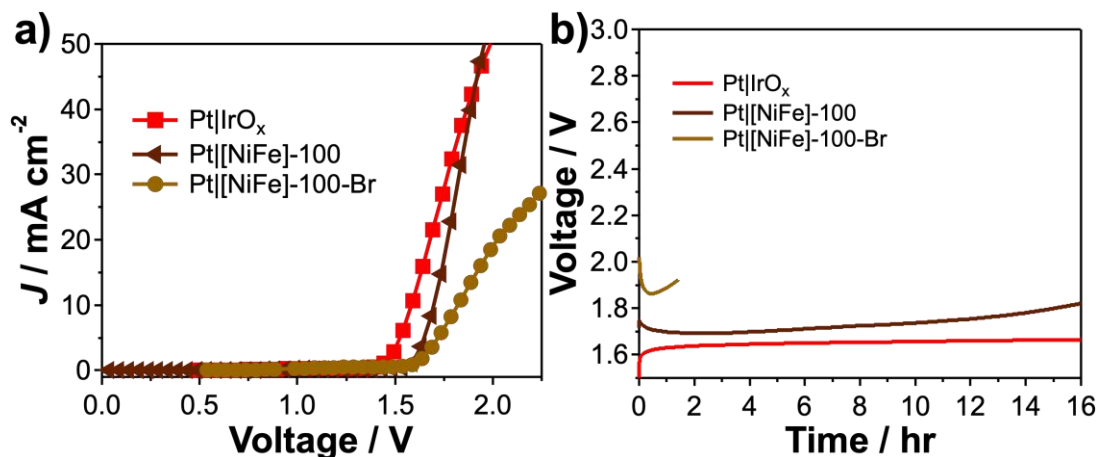

**Figure S6.** a) Steady-state polarization and b) constant-current electrolysis ( $10 \text{ mA cm}^{-2}$ ) data for [NiFe]-LDH samples performing TP-WS under humid-N<sub>2</sub>(g) flow at room temperature with HMT-PMBI-Br (gold) or HMT-PMBI-OH (brown) as the ionomer binder. Nafion-based Pt/C|IrO<sub>x</sub> MEA (red) shown for comparison. [NiFe]-LDH loading of  $0.6 \text{ mg cm}^{-2}$  on the anode; Pt/C loading of  $3 \text{ mg cm}^{-2}$  on C-paper for the cathode.

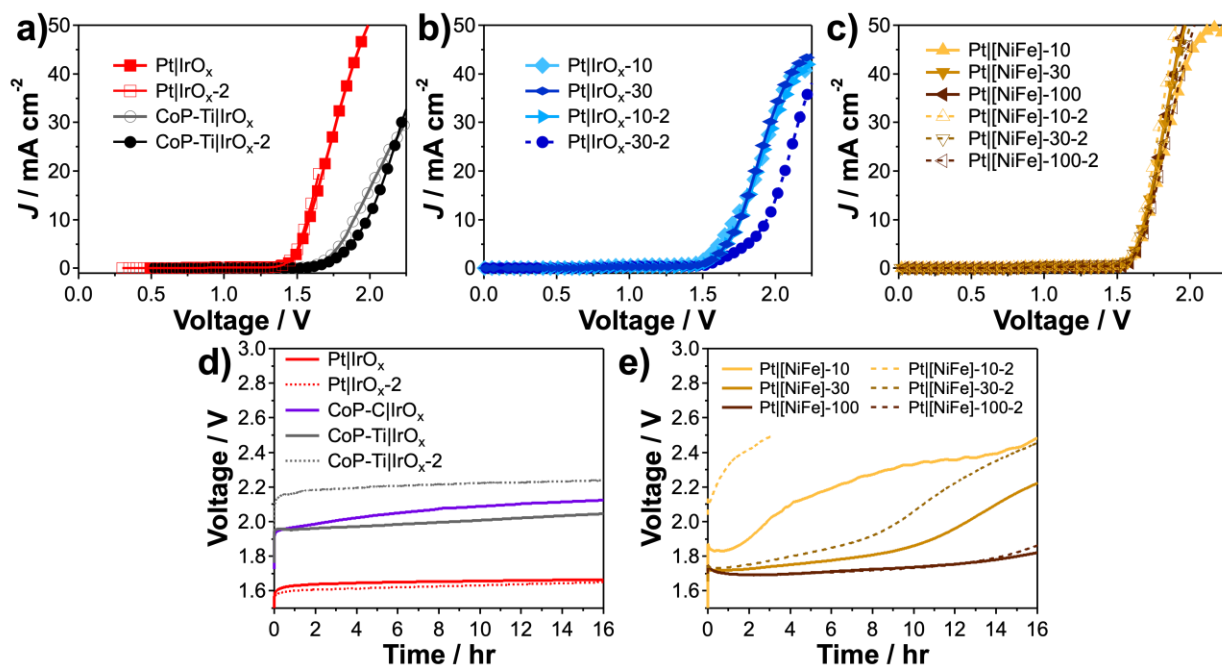

**Figure S7.** a-c) Steady-state polarization and d-e) constant-current electrolysis ( $10 \text{ mA cm}^{-2}$ ) data for multiple samples of a,d) Nafion-based Pt|IrO<sub>x</sub> and CoP-Ti|IrO<sub>x</sub> MEAs, b) Pt|IrO<sub>x</sub> BPM-based MEAs, c,e) Pt|[NiFe] BPM-based MEAs performing TP-WS under humid-N<sub>2</sub>(g) flow at room temperature. CoP loading of  $2.5 \text{ mg cm}^{-2}$  on Ti-paper or C-paper for the cathode; IrO<sub>x</sub> loading of  $3 \text{ mg cm}^{-2}$  on C-paper for the anode; [NiFe]-LDH loading of  $0.6 \text{ mg cm}^{-2}$  on C-paper for the anode; Pt/C loading of  $3 \text{ mg cm}^{-2}$  on C-paper for the cathode.

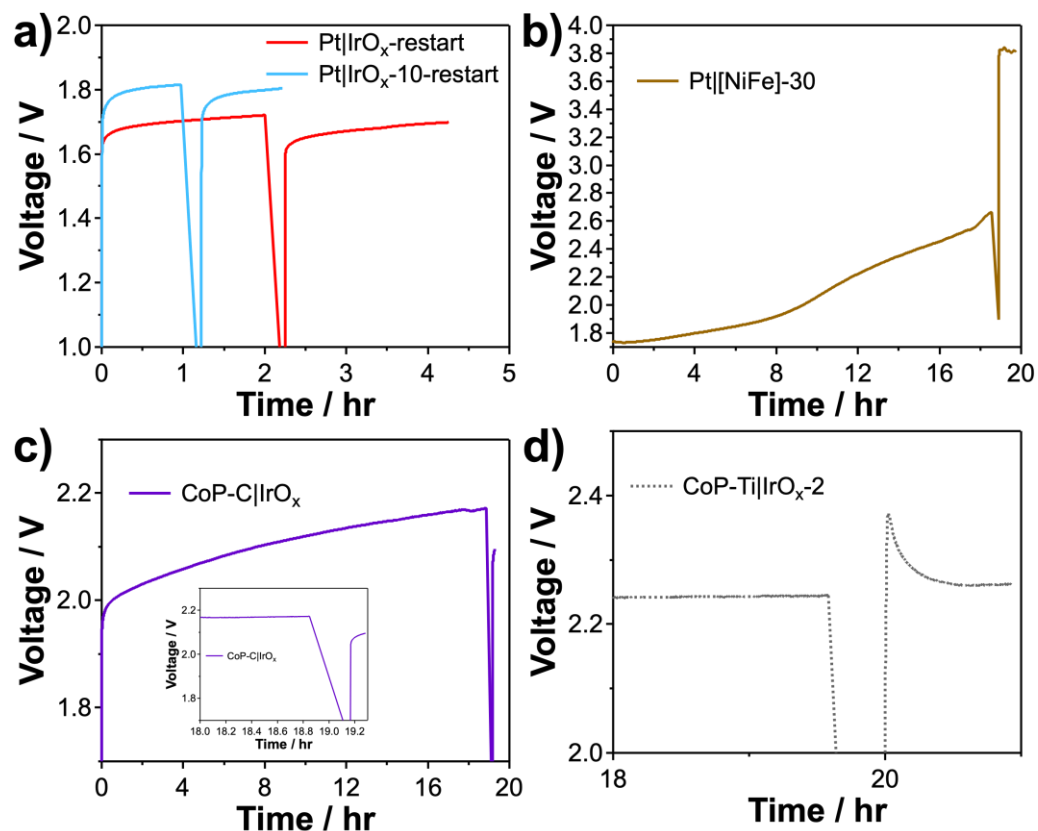

**Figure S8.** Constant-current electrolysis (10 mA cm<sup>-2</sup>) data for a) Nafion-based (red) and BPM-based (blue) Pt|IrO<sub>x</sub> MEAs; b) Pt|[NiFe] BPM-based MEA; c) CoP-C|IrO<sub>x</sub> Nafion-based MEA; and d) CoP-Ti|IrO<sub>x</sub> Nafion-based MEA before and after rehydration of the MEA under open-circuit voltage conditions. CoP loading of 2.5 mg cm<sup>-2</sup> on Ti-paper or C-paper for the cathode; IrO<sub>x</sub> loading of 3 mg cm<sup>-2</sup> on C-paper for the anode; [NiFe]-LDH loading of 0.6 mg cm<sup>-2</sup> on C-paper for the anode; Pt/C loading of 3 mg cm<sup>-2</sup> on C-paper for the cathode.

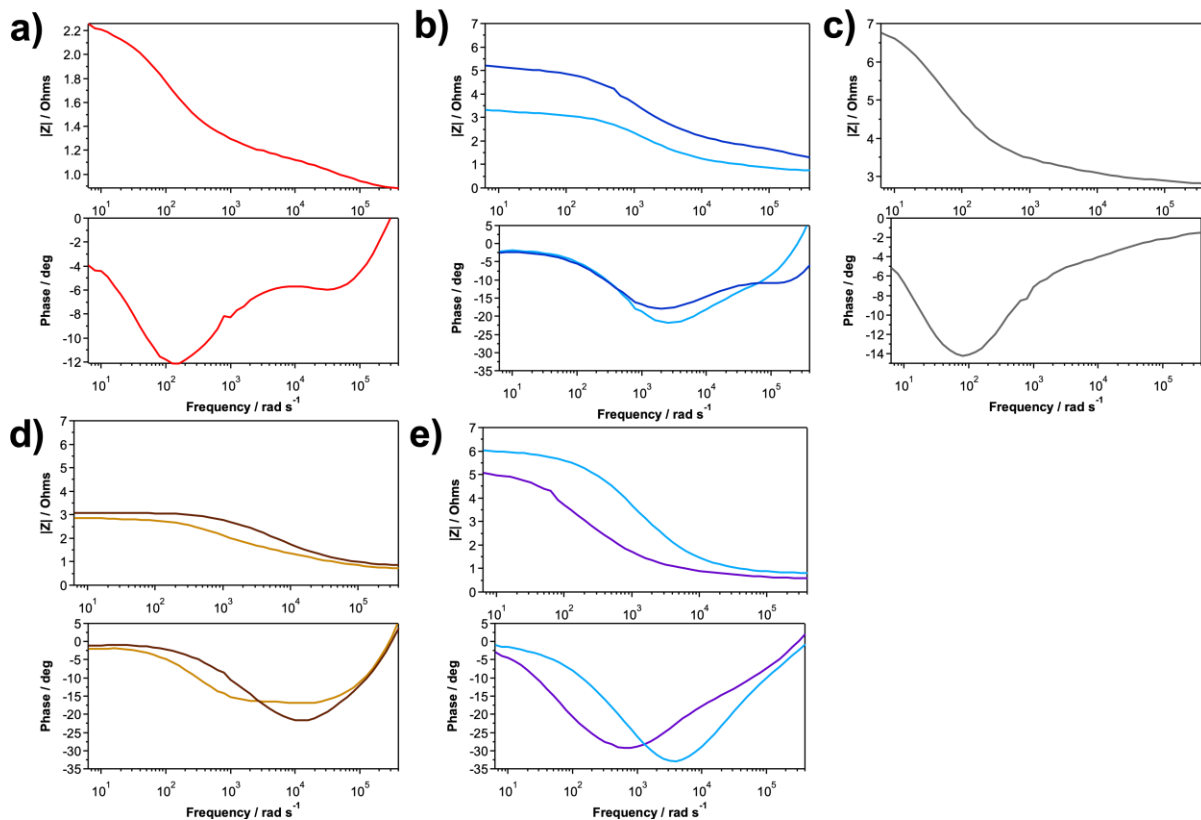

**Figure S9.** Bode Plots for representative MEAs at the operating voltage  $V_{10 \text{ mA cm}^{-2}}$  for TP-WS in this work: a) Pt|IrO<sub>x</sub> Nafion-based MEA; b) Pt|IrO<sub>x</sub> BPM-based MEAs (Pt|IrO<sub>x</sub>-10 light blue; Pt|IrO<sub>x</sub>-30 dark blue); c) CoP-Ti|IrO<sub>x</sub> MEA; d) Pt|[NiFe]-30 (gold) and Pt|[NiFe]-100 (brown) BPM-based MEAs; e) CoP-C|IrO<sub>x</sub> MEA before (purple) and after (blue) constant-current electrolysis at 10 mA cm<sup>-2</sup>.



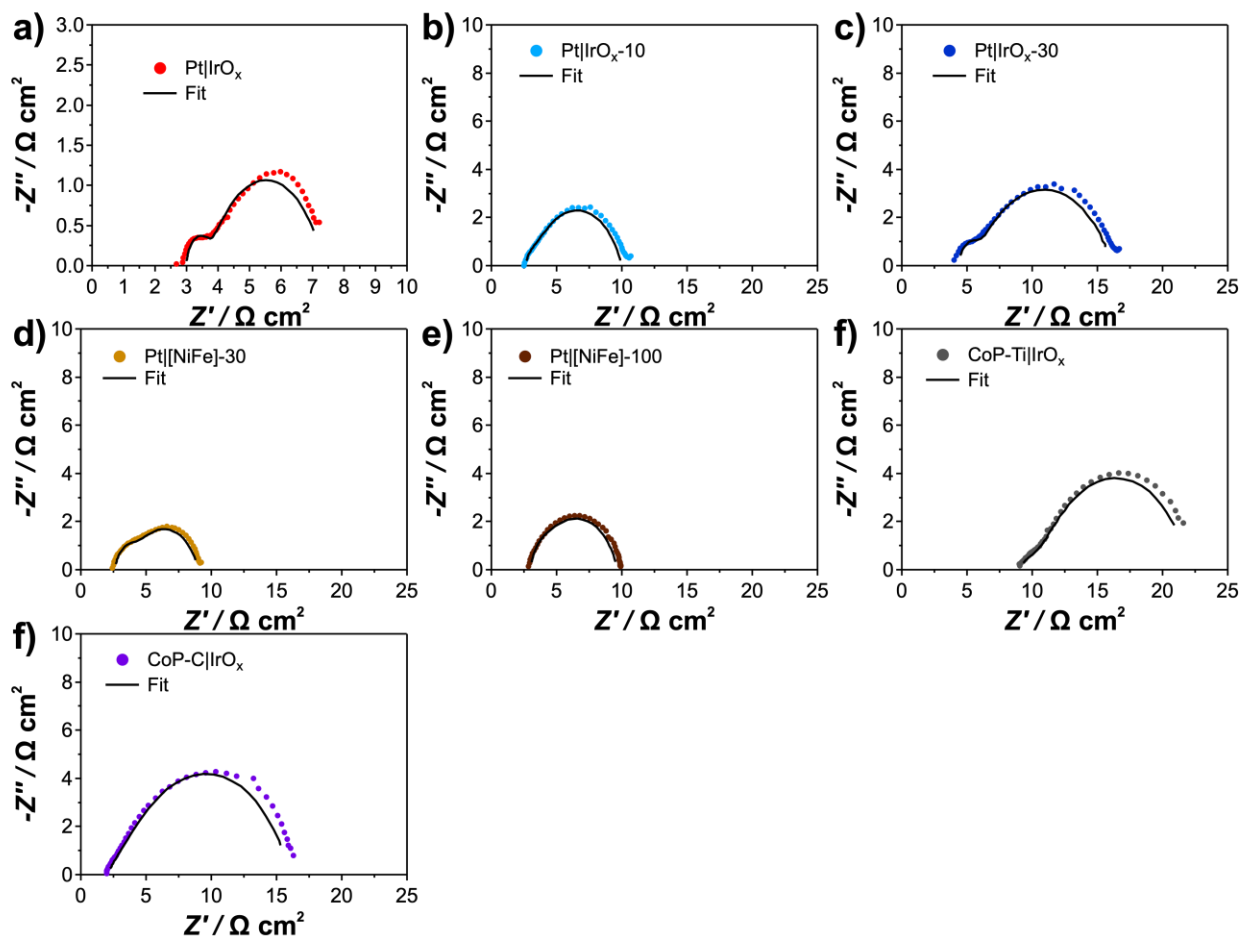

**Figure S10.** Equivalent circuit model fits to EIS spectra at the operating voltage  $V_{10 \text{ mA cm}^{-2}}$  for representative MEAs in this work.

**Table S2.** Series, polarization, mass-transport and activation overvoltages determined from EIS data at  $V_{10 \text{ mA cm}^{-2}}$  for representative MEAs studied in this work.

| MEA                          | $\Delta V_{\text{iR}} \text{ (V)}^{\text{a}}$ | $\Delta V_{\text{polarization}} \text{ (V)}^{\text{b}}$ | $\Delta V_{\text{mxt}} \text{ (V)}^{\text{c}}$ | $\Delta V_{\text{act}} \text{ (V)}^{\text{d}}$ |
|------------------------------|-----------------------------------------------|---------------------------------------------------------|------------------------------------------------|------------------------------------------------|
| Pt IrO <sub>x</sub>          | 0.03                                          | 0.05                                                    | 0.005                                          | 0.38                                           |
| Pt IrO <sub>x</sub> -10      | 0.02                                          | 0.08                                                    | 0.009                                          | 0.56                                           |
| Pt IrO <sub>x</sub> -30      | 0.04                                          | 0.12                                                    | 0.010                                          | 0.54                                           |
| CoP-Ti IrO <sub>x</sub>      | 0.09                                          | 0.13                                                    | 0.012                                          | 0.60                                           |
| CoP-C IrO <sub>x</sub>       | 0.02                                          | 0.14                                                    | 0.010                                          | 0.75                                           |
| CoP-C IrO <sub>x</sub> after | 0.02                                          | 0.17                                                    | -                                              | -                                              |
| Pt [NiFe]-30                 | 0.02                                          | 0.07                                                    | 0.005                                          | 0.48                                           |
| Pt [NiFe]-30 after           | 0.02                                          | 0.32                                                    | -                                              | -                                              |
| Pt [NiFe]-100                | 0.02                                          | 0.08                                                    | 0.005                                          | 0.50                                           |
| Pt [NiFe]-100 after          | 0.02                                          | 0.28                                                    | -                                              | -                                              |

<sup>a</sup>Determined from the  $Z'$  high-frequency intercept in Nyquist plot of the EIS spectra of the MEA at  $V_{10 \text{ mA cm}^{-2}}$ . <sup>b</sup>Width of the Nyquist plot of the EIS spectra of the MEA at  $V_{10 \text{ mA cm}^{-2}}$ . <sup>c</sup>Determined

from application of Equation S1 to steady-state polarization data. <sup>d</sup>Determined from Equation 1 in the manuscript.

**Table S3.** Values of the operating voltage  $V_{10 \text{ mA cm}^{-2}}$  and the drift in the operating voltage during constant-current electrolysis at  $10 \text{ mA cm}^{-2}$  for individual MEAs studied in this work.

| MEA                        | $V_{10 \text{ mA cm}^{-2}} (\text{V})^a$ | $\Delta V_{\text{drift}} (\text{V})^b$ | Rate ( $\text{mV hr}^{-1}$ ) |
|----------------------------|------------------------------------------|----------------------------------------|------------------------------|
| Pt IrRuO <sub>x</sub>      | 1.45                                     | 0                                      | 0                            |
| Pt IrO <sub>x</sub>        | 1.60                                     | 0.05                                   | 2.8                          |
| Pt IrO <sub>x</sub> -2     | 1.59                                     | 0.05                                   | 2.8                          |
| Pt IrO <sub>x</sub> -10    | 1.72                                     | 0.06                                   | 3.3                          |
| Pt IrO <sub>x</sub> -30    | 1.75                                     | 0.03                                   | 1.7                          |
| CoP-Ti IrO <sub>x</sub>    | 1.90                                     | 0.10                                   | 5.5                          |
| CoP-Ti IrO <sub>x</sub> -2 | 2.01                                     | 0.09                                   | 5.0                          |
| CoP-C IrO <sub>x</sub>     | 1.95                                     | 0.19                                   | 10.6                         |
| Pt-Ti IrO <sub>x</sub>     | 1.70                                     | 0.19                                   | 10.6                         |
| Pt [NiFe]-10               | 1.72                                     | 0.78                                   | 43.3                         |
| Pt [NiFe]-10-2             | 1.74                                     | 0.76                                   | 190                          |
| Pt [NiFe]-30               | 1.71                                     | 0.50                                   | 27.8                         |
| Pt [NiFe]-30-2             | 1.75                                     | 0.70                                   | 38.9                         |
| Pt [NiFe]-100              | 1.70                                     | 0.15                                   | 8.3                          |
| Pt [NiFe]-100-2            | 1.70                                     | 0.17                                   | 9.4                          |
| Pt HMT [NiFe]-30           | 1.83                                     | 0.76                                   | 42.2                         |
| Pt [NiFe]-100 HMT          | 1.75                                     | 0.32                                   | 17.8                         |

<sup>a</sup>Operating voltage at  $10 \text{ mA cm}^{-2}$  as determined from steady-state polarization data. <sup>b</sup>Drift in  $V_{10 \text{ mA cm}^{-2}}$  during constant-current electrolysis at  $10 \text{ mA cm}^{-2}$ .

**Table S4.** EIS equivalent circuit model values for representative MEAs in this work. Uncorrected for surface area of MEA.

| MEA                      | $R_s (\Omega)$ | $R_{\text{cath}} (\Omega)$ | $Q_{\text{cath}}^a$ | $\phi_{\text{cath}}$ | $R_{\text{an}} (\Omega)$ | $Q_{\text{an}}^a$ | $\phi_{\text{an}}$ |
|--------------------------|----------------|----------------------------|---------------------|----------------------|--------------------------|-------------------|--------------------|
| Pt IrO <sub>x</sub>      | 0.8944         | 0.23592                    | 0.0004818           | 0.88111              | 1.222                    | 0.03866601        | 0.66835            |
| Pt IrO <sub>x</sub> -10* | 0.81403        | 0.23592                    | 0.0004818           | 0.88111              | 2.212                    | 0.0002194         | 0.75934            |
| Pt IrO <sub>x</sub> -30  | 1.286          | 0.44631                    | 2.4302E-05          | 0.98216              | 3.482                    | 0.00245811        | 0.6883             |
| CoP-Ti                   | 2.741          | 3.528                      | 0.01490799          | 0.76528              | 0.84837                  | 0.02601           | 0.45651            |
| CoP-C initial            | 0.57244        | 3.831                      | 0.00631101          | 0.75567              | 0.82432                  | 0.02221401        | 0.52097            |
| CoP-C after**            | 0.79924        | 4.463                      | 0.00140571          | 0.74212              | 0.82432                  | 0.02221401        | 0.52097            |
| Pt [NiFe]-30             | 0.77181        | 0.4936                     | 0.0002114           | 0.90747              | 1.635                    | 0.00380631        | 0.7388             |
| Pt [NiFe]100             | 0.89998        | 0.28377                    | 0.00013037          | 0.99547              | 1.936                    | 0.00092538        | 0.77069            |

<sup>a</sup> $Q$  unit is  $\Omega^{-1} \text{ s}^\phi$ .

\*Values of  $R_{\text{cath}}$ ,  $Q_{\text{cath}}$ , and  $\phi_{\text{cath}}$  were fixed to values obtained from Pt|IrO<sub>x</sub>.

\*\*Values of  $R_{\text{an}}$ ,  $Q_{\text{an}}$ , and  $\phi_{\text{an}}$  were kept fixed to values obtained from CoP-C initial.

### *Determination of the mass-transport overvoltage at 10 mA cm<sup>-2</sup>.*

The overvoltage associated with mass transport for TP-WS under flow can be determined by

$$\Delta V_{mxt} = \frac{RT}{nF} \left( 1 + \frac{1}{\alpha} \right) \ln \left( \frac{J_{lim}}{J_{lim} - J} \right) \quad (S1)$$

Where R is the ideal gas constant, T temperature, n = 2, F Faraday's constant, charge-transfer coefficient  $\alpha = 0.5$ ,  $J_{lim}$  the limiting current density determined from steady-state polarization data, and J the current density of interest (10 mA cm<sup>-2</sup>).

### *Determination of the longevity of co-ion current at 10 mA cm<sup>-2</sup> in BPM-based MEAs.*

$A_{geometric} = 3 \text{ cm}^2$ ;  $L_{nafion} = 0.0183 \text{ cm}$ ;  $L_{cath} = 0.001 \text{ cm}$ ;  $L_{anode} = L_{HMT-PMBI} = 0.001 \text{ cm}$   
 $[M^+]_{Nafion} = 1.5 \text{ M}$ ;  $[A^-]_{HMT-PMBI} = 1.5 \text{ M}$

Total co-ion current density time at 10 mA cm<sup>-2</sup>:

$$T_{total} = (n_M + n_A) * F / (0.03 \text{ A})$$

$$T_{total} = (3 \text{ cm}^2) * (0.0015 \text{ mol/cm}^3) * (0.0183 \text{ cm} + 0.002 \text{ cm}) * (96485 \text{ C/mol}) / (0.03 \text{ A})$$

$$T_{total} = 290 \text{ s}$$

### *Calculation of current contribution through carbonate removal.*

From Ref <sup>3</sup>:

$C_{CO_2} = 5 \text{ ppm}$  (via GC-MS, constant value for ca. 50 h, flow rate of 0.1 L/min)

$V_{CO_2} = 5 \text{ ppm}$  (0.1 L/min)(3000 min) = 1.5 mL

$T = 323 \text{ K}$

$N_{CO_2} = PV/RT = (1 \text{ atm})(0.0015 \text{ L}) / [(0.08206 \text{ atm} \cdot \text{L/K} \cdot \text{mol})(323 \text{ K})] = 5.6 \times 10^{-5} \text{ mol}$

Current:  $I = ZNF/t = 2 * (5.6 \times 10^{-5} \text{ mol}) (96485 \text{ C/mol}) / (1.8 \times 10^5 \text{ s}) = 6.1 \times 10^{-5} \text{ A}$

Area = 5 cm<sup>2</sup>;  $J = 300 \text{ mA/cm}^2$

%Current(Carbonate removal) =  $100 * 6.1 \times 10^{-5} \text{ A} / (5 * 0.3 \text{ A}) = 0.004\%$

This Work: (Assume 5 ppm CO<sub>2</sub> being constantly generated)

Flow rate of 0.2 L/min;  $V_{CO_2} = 5 \text{ ppm}$  (0.2 L/min)(960 min) = 0.96 mL

$T = 298 \text{ K}$

$N_{CO_2} = (1 \text{ atm})(0.00096 \text{ L}) / [(0.08206 \text{ atm} \cdot \text{L/K} \cdot \text{mol})(298 \text{ K})] = 3.9 \times 10^{-5} \text{ mol}$

Current: ( $Z = 4$  for this process)  $I = 4 * (3.9 \times 10^{-5} \text{ mol}) (96485 \text{ C/mol}) / 57600 \text{ s} = 0.26 \text{ mA}$

%Current(Carbonate removal) =  $100 * 0.26 \text{ mA} / [(1.6 \text{ cm}^2)(10 \text{ mA/cm}^2)] = 1.7\%$

### *References*

- (1) Bockris, J. O. Kinetics of Activation Controlled Consecutive Electrochemical Reactions: Anodic Evolution of Oxygen. *J. Chem. Phys.* **1956**, 24 (4), 817–827. <https://doi.org/10.1063/1.1742616>.
- (2) Shinagawa, T.; Garcia-Esparza, A. T.; Takanabe, K. Insight on Tafel Slopes from a Microkinetic Analysis of Aqueous Electrocatalysis for Energy Conversion. *Sci. Rep.* **2015**, 5, 1–21. <https://doi.org/10.1038/srep13801>.
- (3) Watanabe, S.; Fukuta, K.; Yanagi, H. Determination of Carbonate Ion in MEA during Alkaline Membrane Fuel Cell (AMFC) Operation. *ECS Trans.* **2010**, 33 (1), 1837–1845.
